# Supplementary material
Source: Springer Nature journal article supplement (https://www.springermedizin.de/resource/supplementary/12889_2007_1048_MOESM6_ESM.pdf/9503214)

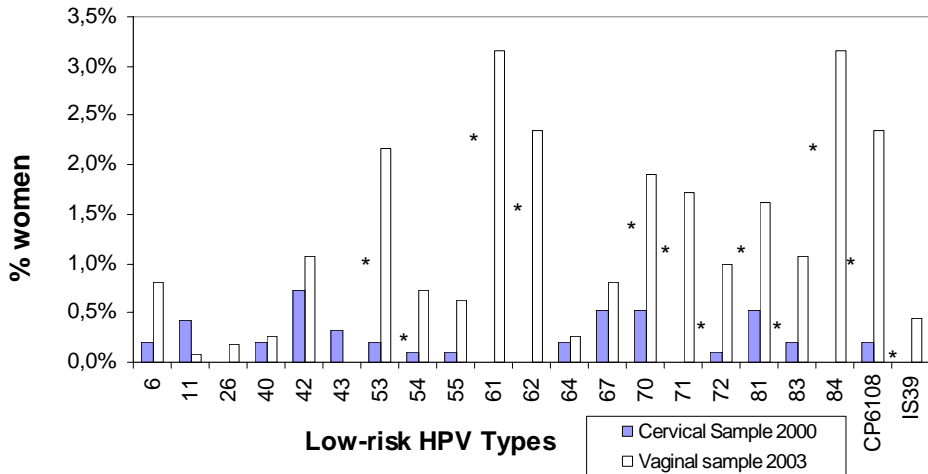

Supplement: MOESM6 [file 9503214]
